# Supplementary material for: A Sensitive Method for Detecting Beauveria bassiana, an Insecticidal Biocontrol Agent, Population Dynamics, and Stability in Different Substrates
Source: Can J Infect Dis Med Microbiol. 2023 Aug 25;2023:9933783. doi: 10.1155/2023/9933783 (PMC10473894; doi:10.1155/2023/9933783)
Supplement: Supplementary Materials — Supplementary Figure S1: gradient PCR products separated in an agarose gel after electrophoresis. Supplementary Figure S2: standard curve of qRT-PCR. Supplementary Figure S3: qRT-PCR curves determined using different concentrations of plasmid DNA. Supplementary Table 1: six sets of PCR primers used in this study. [file 9933783.f1.zip]

Archive with 2 entries (2 files):
- Supplemental Figure.docx
- Supplemental Table.docx
